# Supplementary material for: In Vitro Effect of the Biomechanics After Photodynamic Therapy (PDT) Intervention on Rabbit Cornea
Source: Research Square preprint supplement (doi:10.21203/rs.3.rs-475747/v1), 2021-05-19
Supplement: Supplementary file 1 [file 853694800668ce9c5568eefd.docx]

**Appendix table 2** Results were compared before and after the Pentacam examination (mean ± SD)

|  |  | Before treatment | After treatment | *t* | *p* |
| --- | --- | --- | --- | --- | --- |
| K1 | CXL | 42.850±1.565 | 42.687±2.707 | 0.186 | 0.858 |
| TBOR | 43.275±1.002 | 44.225±3.134 | -1.017 | 0.343 |
| K2 | CXL | 44.138±0.896 | 44.338±2.900 | -0.187 | 0.857 |
| TBOR | 44.925±1.731 | 45.757±2.710 | -0.518 | 0.620 |
| ACD | CXL | 2.756±0.063 | 2.695±0.220 | 0.720 | 0.495 |
| TBOR | 2.772±0.276 | 2.280±0.228 | -0.363 | 0.728 |
| Pupil diameter | CXL | 5.280±0.146 | 4.783±0.465 | 0.993 | 0.354 |
| TBOR | 5.033±1.187 | 5.095±0.678 | -0.019 | 0.854 |
| C.A.Mean | CXL | 35.888±5.874 | 31.925±7.580 | 1.288 | 0.239 |
| TBOR | 30.700±4.973 | 33.063±5.830 | -1.014 | 0.3444 |
| C.Volume | CXL | 178.113±48.587 | 188.775±35.150 | -0.493 | 0.637 |
| TBOR | 212.125±22.819 | 212.675±35.413 | -0.404 | 0.969 |

*t* value is used to compare the means of two independent samples.
